# Supplementary figures and images for: A catalytic aldol condensation system enables one pot conversion of biomass saccharides to biofuel intermediates
Source: Royal Society of Chemistry journal article supplement (doi:10.1039/c7gc00362e), 2017-01-01

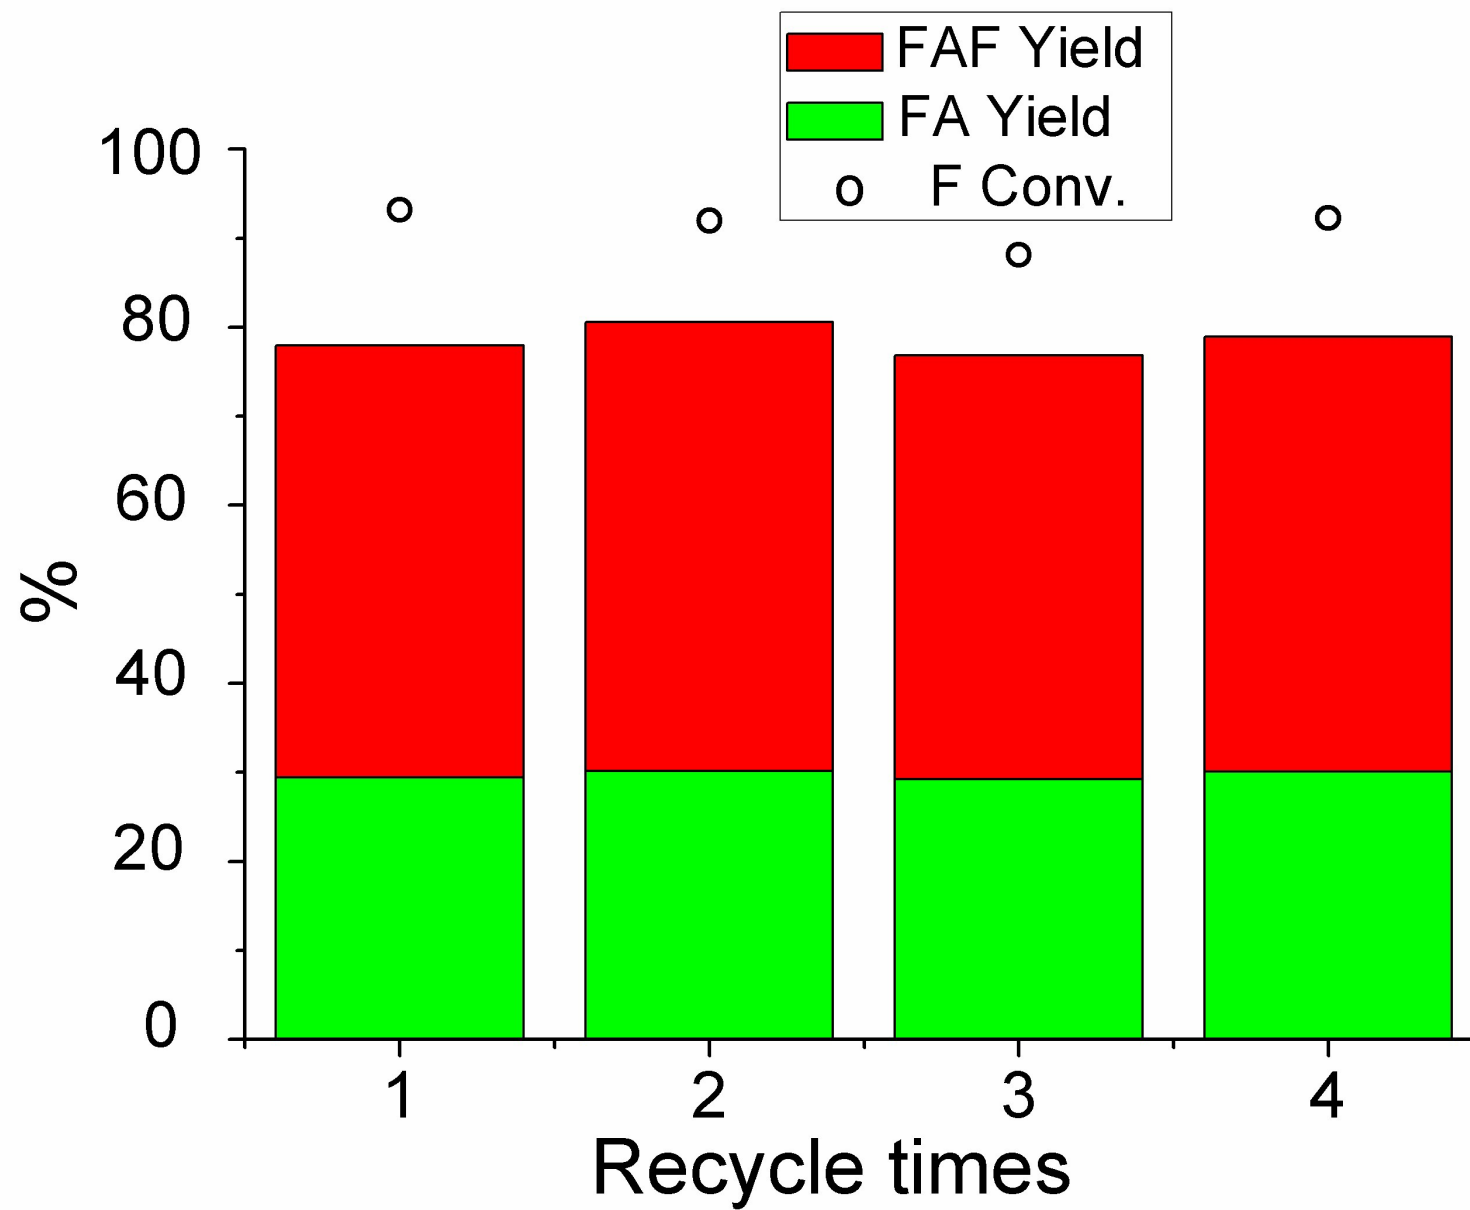

Supplement: c7gc00362e2.pdf [file c7gc00362e2.pdf]
